# Supplementary material for: Facilely synthesized carbon dots and configurated light-emitting diodes with efficient electroluminescence
Source: Royal Society of Chemistry journal article supplement (doi:10.1039/d2cp04102b), 2022-01-01
Supplement: d2cp04102b1.pdf [file d2cp04102b1.pdf]

## Supporting Information

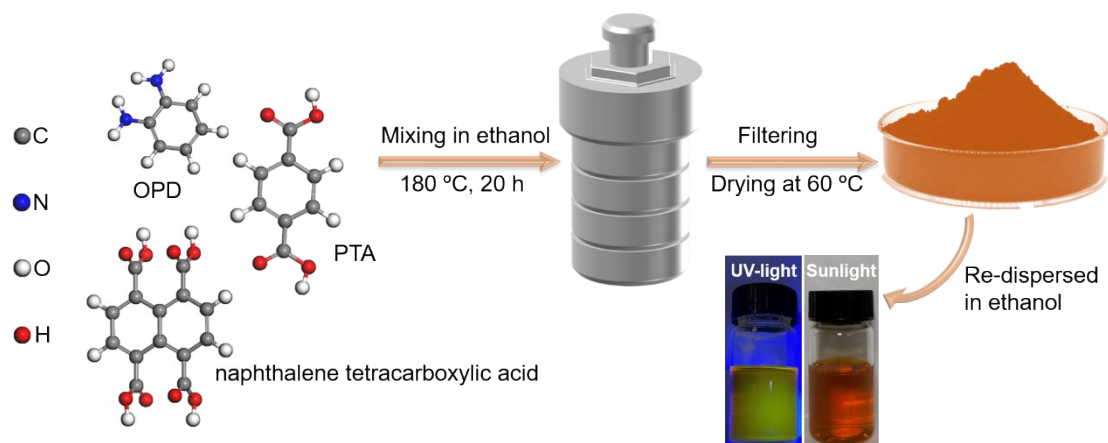

**Fig. S1** Schematic synthesis process of CDs

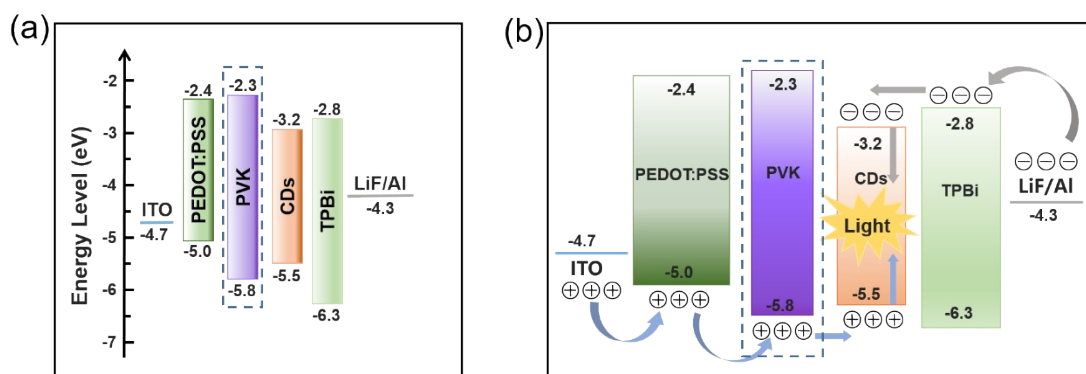

**Fig. S2** (a) Energy level diagram of CDs-based LEDs; (b) Probable carrier injection and transporting process in CDs-based LEDs.

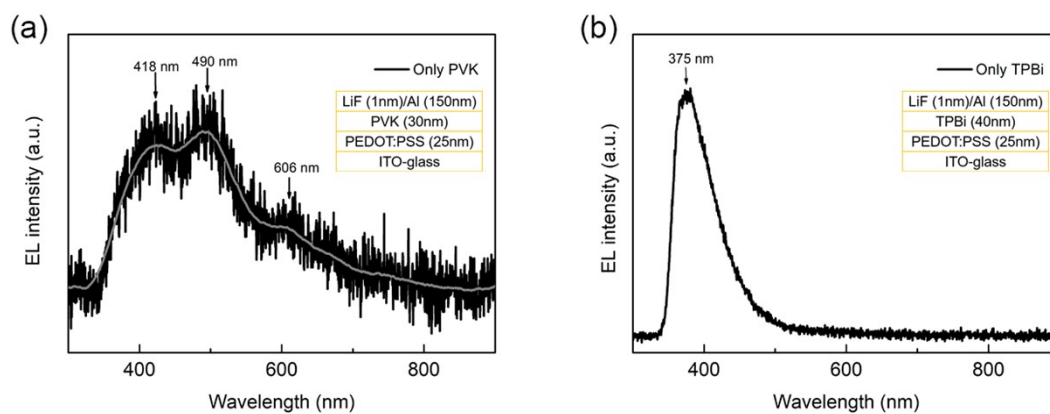

**Fig. S3** (a) EL spectrum of device with configuration comprising of ITO (anode)/ PEDOT:PSS/ PVK (emitter)/ LiF/Al (cathode); (b) EL spectrum of device with configuration comprising of ITO (anode)/ PEDOT:PSS/ TPBi (emitter)/ LiF/Al (cathode).
